# Supplementary material for: RGS4 controls Gαi3-mediated regulation of Bcl-2 phosphorylation on TGN38-containing intracellular membranes
Source: Oxford University Press journal article supplement (doi:10.1242/jcs.241034), 2020-01-01
Supplement: jcs241034supp.pdf [file jcs241034supp.pdf]

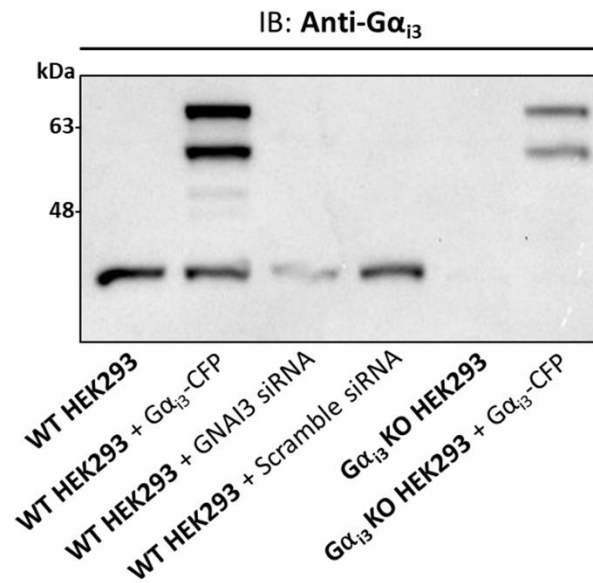

**Fig. S1: profiling of  $\text{G}\alpha_{i3}$  protein expression in wild type and  $\text{G}\alpha_{i3}$ -KO HEK293 cells.** Western blot using (anti- $\text{G}\alpha_{i3}$  antibody) performed on lysates of HEK293 cells. From the left lane to the right lane, HEK293 cells were untransfected, transfected with  $\text{G}\alpha_{i3}$ -CFP, transfected with SiRNA against  $\text{G}\alpha_{i3}$ , transfected with scramble SiRNA respectively. The two right-most lanes correspond to HEK293 cells in which  $\text{G}\alpha_{i3}$  was knocked out using CRISPR technique with  $\text{G}\alpha_{i3}$ -CFP add-back in the last lane of the gel.

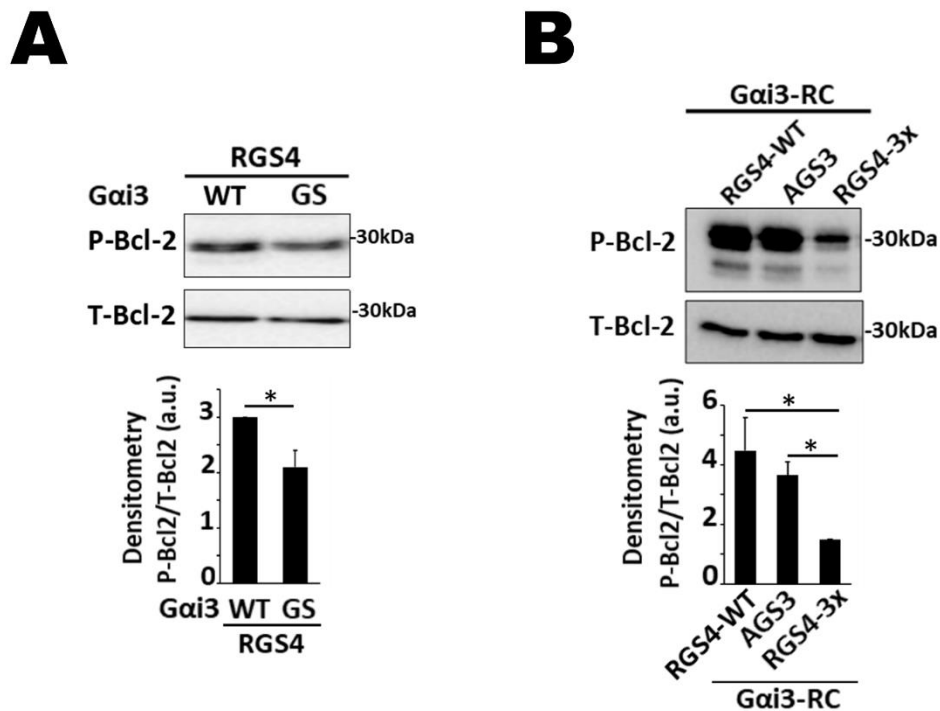

**Fig. S2: Functional RGS4 or AGS3 co-expression with Gai3-RC promotes increased levels of P-Bcl2.** **A**, The *upper panel* shows Western blots for P-Bcl2 and T-Bcl2 following when cells expressing Gai3-WT or Gai3 (GS) are co-transfected with wild type RGS4. The *bottom panel* is the histogram showing the means of P-Bcl2/T-Bcl2 levels for the indicated constructs. **B**, The *upper panel* shows Western blots for P-Bcl2 and T-Bcl2 following when cells expressing Gai3-RC and RGS4-WT, RGS4 (3x), a triple-mutant that inhibits Gαq but not Gi, and the GDI inhibitory protein AGS3. The *bottom panel* is the histogram showing the means of P-Bcl2/T-Bcl2 levels for the indicated constructs. In all panels error bars represent SEM (n=3). One-way ANOVA and Tukey's post hoc was used to determine \*p<0.05 The western blots are representative to three independent experiments carried out on separate days.

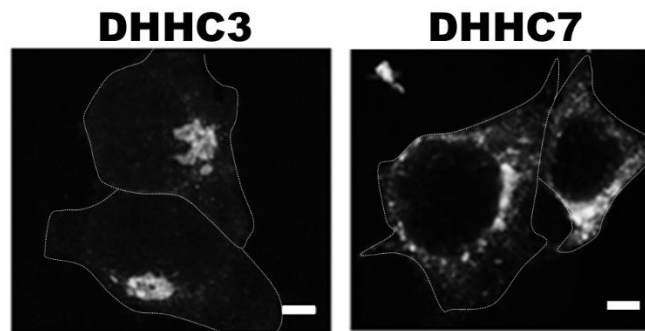

**Fig. S3: Intracellular distribution of DHHC3 and DHHC7.** Confocal microscopy images of HEK293 cells immunostained for HA tagged-DHHC3 and -DHHC7. *White bars* represent 1  $\mu\text{m}$ . *White dashes* lines mark the outline of the cells.

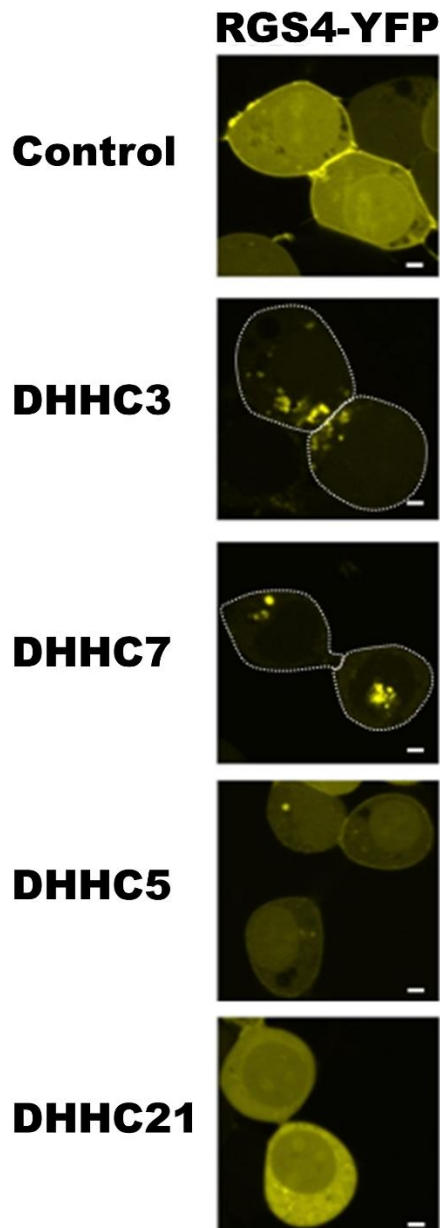

**Fig. S4:** Exogenous expression of DHHC3 and DHHC7 impair the intracellular localization of **RGS4-YFP**. Confocal microscopy pictures of RGS4-YFP in function of the exogeneous expression of DHHC 3, 5, 7 and 21. RGS4-YFP was stably expressed in HEK cells. white bars are representative of 1  $\mu$ m. *White dashes* lines mark the outline cells. Data are representative to at least three independent experiments carried out on separate days.

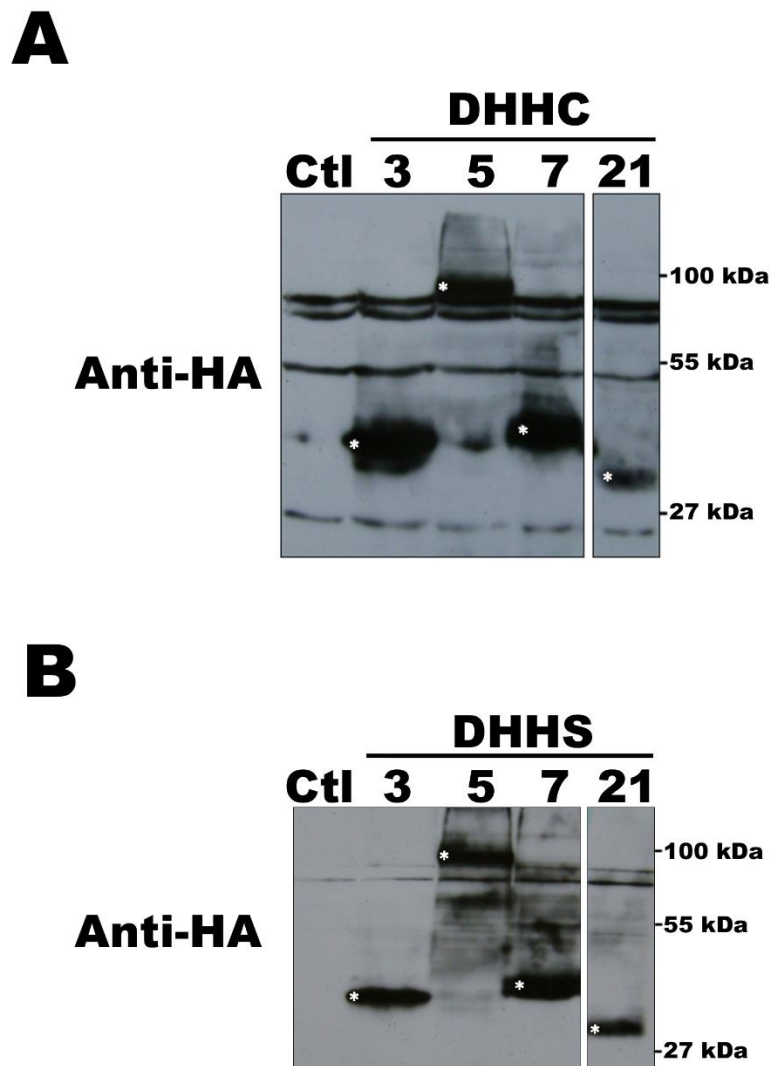

**Fig. S5:** Western blots showing the exogenous expression of the indicated HA-tagged DHHC clones in **A**, and DHHS clones in **B**. In both panels white stars have been added on the left side of the corresponding bands to indicate their position/size.

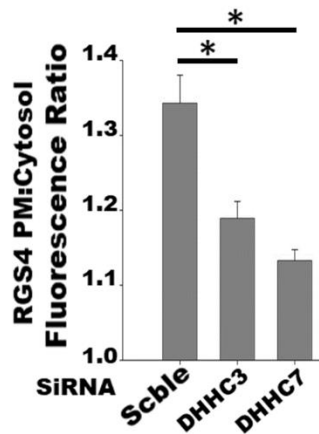

**Fig. S6: Endogenous DHHC3 and DHHC7 palmitoyl-CoA transferase activity are important for RGS4 targeting to the plasma membrane.** Histogram showing the means of plasma membrane to cytosol expression ratios of RGS4-YFP when either DHHC3 or DHHC7 mRNA expression was knocked down using SiRNA. The data are representative of three independent experiments carried out on separate days and error bars stand for SEM (n=3). One-way ANOVA and Tukey's post hoc were used to determine \*p<0.05.

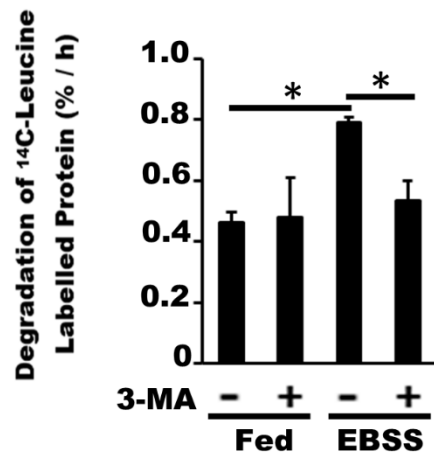

**Fig. S7:** Control assay to show the extent to which <sup>14</sup>C-leucine labelled protein degradation rates vary with nutrient availability in HEK293 cells and their dependence on VPS34 activity/autophagic flux. Histogram shows the means of degradation rates of <sup>14</sup>C -leucine labelled long-lived proteins as a function of nutrient availability and VPS34 activity in HEK293 cells. Fed represents cells cultured in 10 % FBS DMEM/F-12 (v/v) medium, whereas EBSS represents cells cultured in a nutrient-deprived medium containing 0.2% of FBS and 0.2% of BSA. 3-MA is an inhibitor of VPS34 and autophagy flux. The data are representative of three independent experiments carried out on separate days. *Error bars* represent SEM (n=3) and one-way ANOVA and Tukey's post hoc was used to determine \*p<0.05.

| Gene Name     | Accession Number | Forward Primer<br>5' → 3' | Reverse Primer<br>5' → 3' |
|---------------|------------------|---------------------------|---------------------------|
| <b>GAPDH</b>  | NM_002046.3      | GAAGGTGAAGGTCGGAGTCA      | GAAGATGGTGATGGGATTTTC     |
| <b>18S</b>    | NR_003286        | AGGAATTGACGGAAGGGCAC      | GGACATCTAAGGGCATCACA      |
| <b>DHHC1</b>  | NM_013304        | ACCTGCTCTGCTTCCACATT      | GACTCGAGCTCCCTGTGAAC      |
| <b>DHHC2</b>  | NM_016353        | TCTAGGTGATGGCTGCTCCT      | AATGGCTTTGCAGGAAACTG      |
| <b>DHHC3</b>  | NM_016598.1      | GGAACCATGTGGTTTATCCG      | CACAATTCCGTTGATGATGC      |
| <b>DHHC4</b>  | NM_018106.3      | ATTGATCTGTCTCTGCAGCC      | CAGCTCTGGCATTCTCTTTC      |
| <b>DHHC5</b>  | NM_015457.2      | GACAGCTTGAAGGAGCCAAC      | AGCCACTGGATAGTGGATCG      |
| <b>DHHC6</b>  | NM_022494.1      | CAGTTCACAGCTTGAAGGCA      | TACCCATTTTGGCAAGGAAG      |
| <b>DHHC7</b>  | NM_017740        | ACCTGAGAACCATGCTCACC      | TGTAGATGACTTCCCCAGGC      |
| <b>DHHC8</b>  | NM_013373        | AGGACTTTGACCACCACTGC      | TGGTTCAGCACGTAGACCAG      |
| <b>DHHC9</b>  | NM_016032.2      | CCTTGTCTCAGGAGGAGACAGC    | GAACCACGGAGACCCAAC        |
| <b>DHHC11</b> | NM_024786        | AGATTCAGGAGCTCAGGTGC      | CAGGAGGCTTTGCAAGGTAG      |
| <b>DHHC12</b> | NM_032799        | AATTCATCTCCTCACACCGC      | GCCATCCACAGAAGAAGTGG      |
| <b>DHHC13</b> | NM_019028.2      | CAGTGCAGGAATCACAGCC       | AGAGCTTCTCTTGCATTGGC      |
| <b>DHHC14</b> | NM_024630.2      | AGCCTGATCGACAGAAGAGG      | TGAATGCACTGGTCTTGGTC      |
| <b>DHHC15</b> | NM_144969        | TGAGTCACAGAACCCACTGC      | CCGTTTCCACAGCAAGAGAT      |
| <b>DHHC16</b> | NM_032327.2      | CTGTGCAGTTCTGTGGCACT      | AAATACTCTGCCCTTGGCCT      |
| <b>DHHC17</b> | NM_015336        | ATGGTCAGATGGTCAGGAGC      | TCCCAAAGGTTACCATCAT       |
| <b>DHHC18</b> | NM_032283        | AGGGTTTCACACGTACCTCG      | ATGGCTGTAGGGGTTGACAG      |
| <b>DHHC19</b> | NM_001039617     | GAATCTGCACCCCTCCAATGT     | GTGGAACCTCCTGGAGAGCTG     |
| <b>DHHC20</b> | NM_153251        | CGTGGTCTGCTGGTCTTACT      | AGCCACAAGGTAAACAACGG      |
| <b>DHHC21</b> | NM_178566        | GTGGTTTATTCTTTTCAGGC      | AAAACCTGTAACGCATTGCC      |
| <b>DHHC22</b> | NM_174976        | CCTTGTCTCCACCCATGACT      | CGTGAGGAGCCTAGAAATGC      |
| <b>DHHC23</b> | NM_173570.3      | CAATACCCACGGAGCACTTT      | AATAAGCAGCACGTTGTCCC      |
| <b>DHHC24</b> | NM_207340        | ATCACCTTCCAGACCACAGC      | GATGTTAAGGTCCAACCCGA      |

**Table. S1:** List of RT-qPCR primers used to measure DHHC protein mRNA expression levels in HEK293 cells.
